# Supplementary material for: Genomic characterization of MDR/XDR-TB in Kazakhstan by a combination of high-throughput methods predominantly shows the ongoing transmission of L2/Beijing 94–32 central Asian/Russian clusters
Source: Springer Nature journal article supplement (doi:10.1186/s12879-019-4201-2), 2019-06-24
Supplement: MOESM2 [file 16847704]

**Supplementary Figure 3: IS6110-RFLP patterns obtained in Kazakhstan (2001) and Uzbekistan. (2001-2004)**

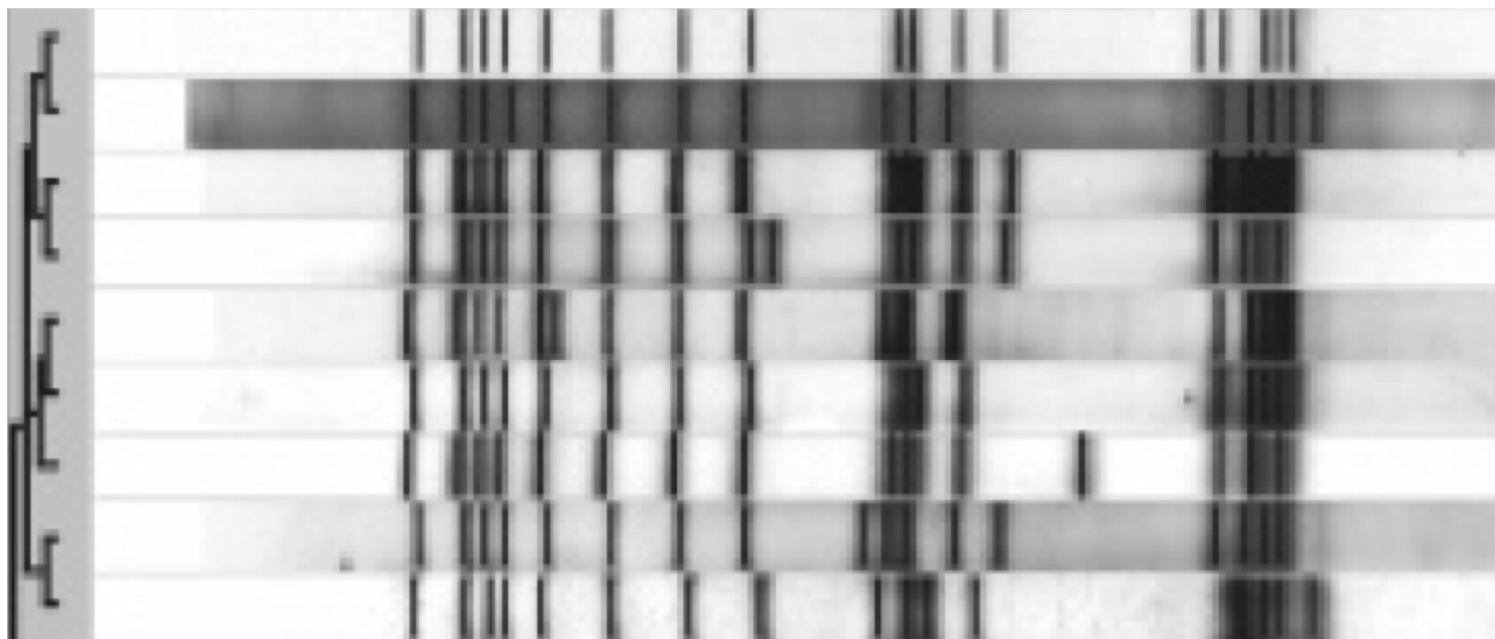

*extracted from  
Kubica et al.  
2005  
Figure 3  
(Table :  
correspondance  
with cluster 4 or  
6)*

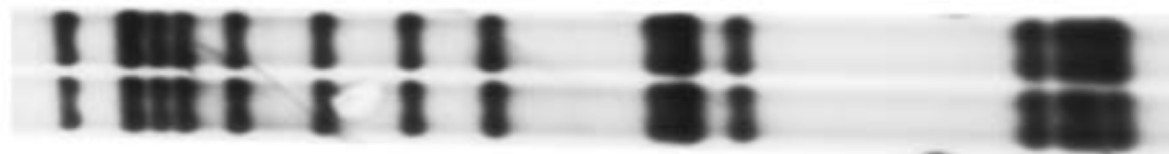

*extracted from  
Niemann et al.  
2009*
